# Supplementary material
Source: publisher figshare collection journal article supplement (https://acs.figshare.com/ndownloader/files/3904510)
Supplement: Supplementary file 1 [file 3904510]

## Supplementary Material:

### Asymmetric Vesicle Constructed by AB/CB Diblock Copolymer Mixture and Its Behavior: A Monte Carlo Study

Jie Cui, Yuanyuan Han,\* and Wei Jiang\*

*State Key Laboratory of Polymer Physics and Chemistry, Changchun Institute of Applied Chemistry, Chinese Academy of Sciences, Changchun 130022, P. R. China*

#### Table of contents:

**S1.** Vesicle structure obtained from the artificial asymmetric vesicle (the inner and outer surfaces are covered by solely one kind of hydrophilic block) after running for a sufficiently long time.

**S2.** Vesicle structures and formation pathway of the  $A_3B_4/C_3B_4$  diblock copolymer mixture with different initial states and anneal speeds at  $f_{A_3B_4} = 25\%$ .

**S3.** Possible vesicle structures formed by the mixture of  $A_3B_4/C_3B_4$  (blocks C are charged,  $\varepsilon_{CC} = 0.5$ ) with  $f_{A_3B_4} = 40\%$  and  $42\%$  when the initial states are changed.

---

\*Corresponding author. E-mail: yyhan@ciac.ac.cn, wjiang@ciac.ac.cn. Tel: 86-431-85262151. Fax: 86-431-85262126

**S1:** The simulation result shows that after running for about more than 5000 time steps (in each time step, 7000 MCS are performed), the structure of artificial asymmetric vesicle still remain unchanged.

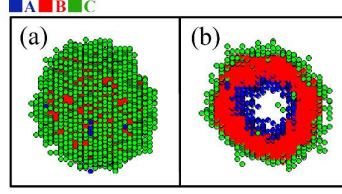

Figure S1. Vesicle structure (a) and its cross-section (b) of artificially made well-layered asymmetric vesicles after running for more than 5000 time steps.

**S2:** The simulation results show that the asymmetric vesicle membrane structure is independent of the initial state (Figure S2) and the dynamic process (Figure S3-4), which proves that the asymmetric vesicle structure is stable.

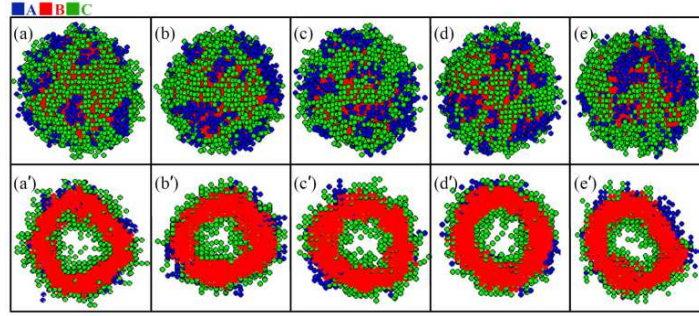

Figure S2. Membrane structures of the asymmetric vesicles formed by  $A_3B_4/C_3B_4$  diblock copolymer mixture with different initial states ( $f_{A_3B_4} = 25\%$ ). (a')-(e') are the cross-sections corresponding to (a)-(e) respectively.

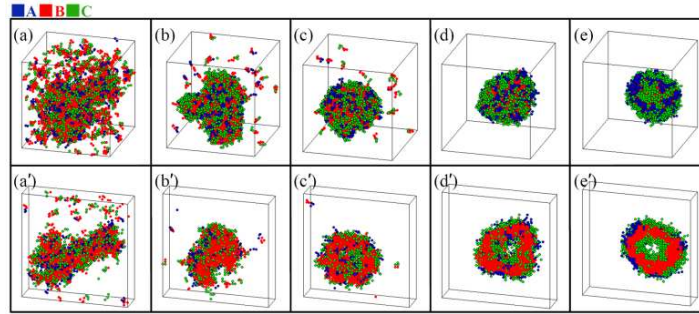

Figure S3. Snapshots showing the pathway of asymmetric vesicle formation of  $A_3B_4/C_3B_4$  diblock copolymer mixture with  $f_{A_3B_4} = 25\%$  at a slower annealing speed

(the annealing speed is 0.0002 per time step, 9000 Monte Carlo Steps (MCS) were performed at each time step). Simulation time: (a)  $7.2 \times 10^5$ , (b)  $9.0 \times 10^5$ , (c)  $9.9 \times 10^5$ , (d)  $1.4 \times 10^6$ , (e)  $3.6 \times 10^6$  MCS. For the purpose of clarity, the cross sections of the micelles are given in (a')-(e').

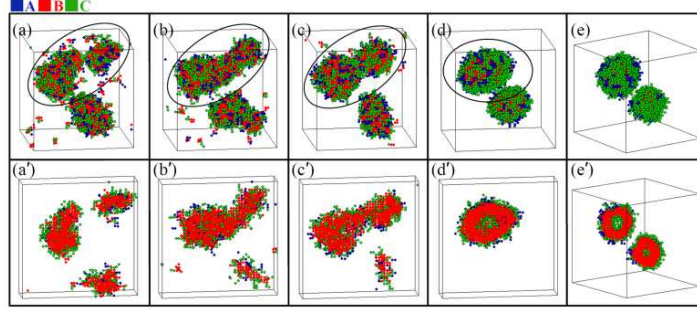

Figure S4. Snapshots showing the pathway of asymmetric vesicle formation of  $A_3B_4/C_3B_4$  diblock copolymer mixture with  $f_{A_3B_4} = 25\%$  at a faster annealing speed (the annealing speed is 0.0008 per time step, 7000 Monte Carlo Steps (MCS) were performed at each time step). Simulation time: (a)  $1.6 \times 10^5$ , (b)  $1.9 \times 10^5$ , (c)  $2.0 \times 10^5$ , (d)  $5.6 \times 10^5$ , (e)  $2.1 \times 10^6$  MCS. (a')-(d') are the cross sections of the circled micelles in (a)-(d); (e') shown the cross sections for the two vesicles shown in (e).

**S3: The simulation results indicate that due to the competition between the effects of the mixed ratio of the two diblock copolymers and the solution pH, some metastable states can be observed when  $f_{A_3B_4} = 40\%$  and  $42\%$ .**

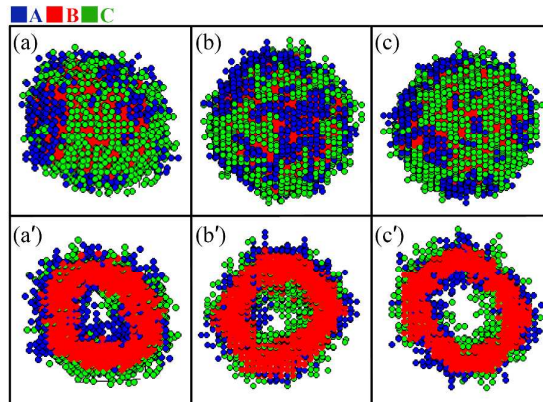

Figure S5. Possible vesicle structures formed by the mixture of  $A_3B_4/C_3B_4$  (blocks C are charged,  $\epsilon_{CC} = 0.5$ ) with  $f_{A_3B_4} = 40\%$  (a, b and a', b') and  $42\%$  (c, c') when the initial states are changed.
